# Supplementary material for: Surface plasmon resonance allied applications of silver nanoflowers synthesized from Breynia vitis-idaea leaf extract
Source: Royal Society of Chemistry journal article supplement (doi:10.1039/d1dt03592d), 2022-01-01
Supplement: d1dt03592d1.pdf [file d1dt03592d1.pdf]

## **Supplementary Informaion (SI)**

# **Surface Plasmon Resonance Allied Applications of Silver Nanoflowers Synthesized from *Bregnia-Vitis-Idaea* Leaves Extract**

Ruby<sup>§</sup>, Aryan<sup>§</sup> and Mohan Singh Mehata\*

Laser-Spectroscopy Laboratory, Department of Applied Physics, Delhi Technological University, Bawana Road, Delhi-110042, INDIA

\*Corresponding author e-mail; M.S. Mehata: [msmehata@gmail.com](mailto:msmehata@gmail.com)

<sup>§</sup>Both the authors contributed equally.

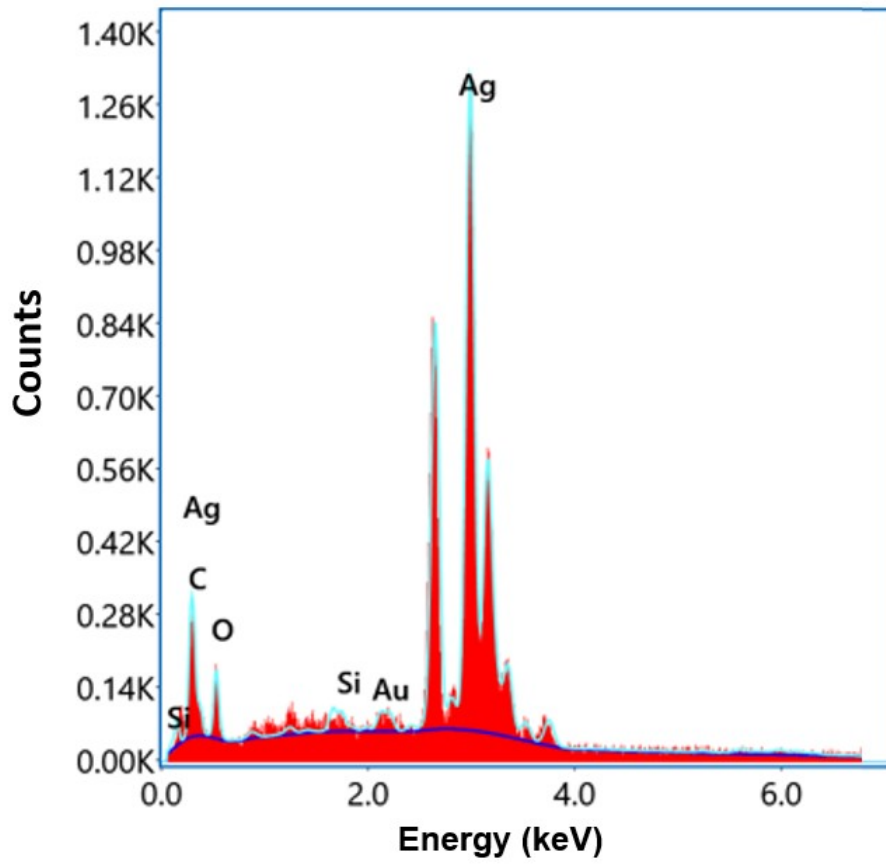

**Figure S1:** EDX data shows the presence of silver constituents.

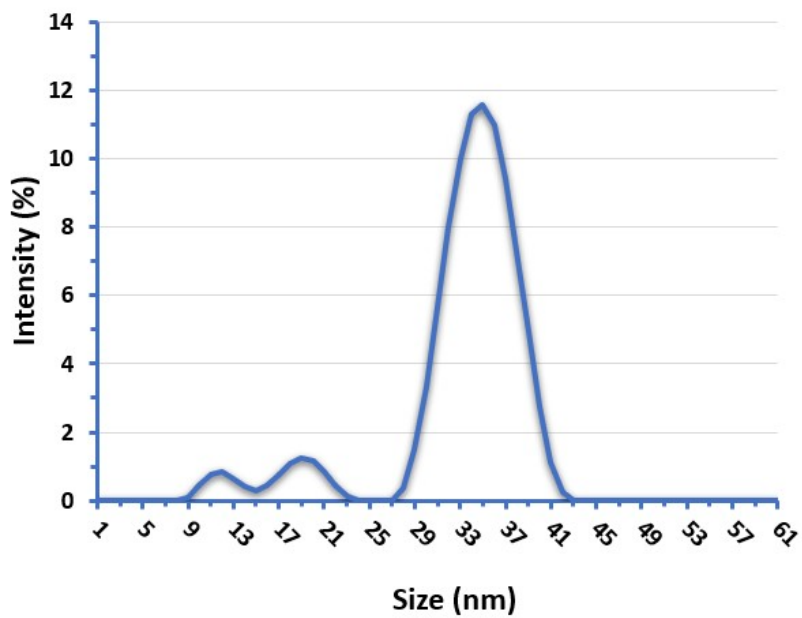

**Figure S2:** Particle size distribution of synthesized AgNPs using Zeta potential.

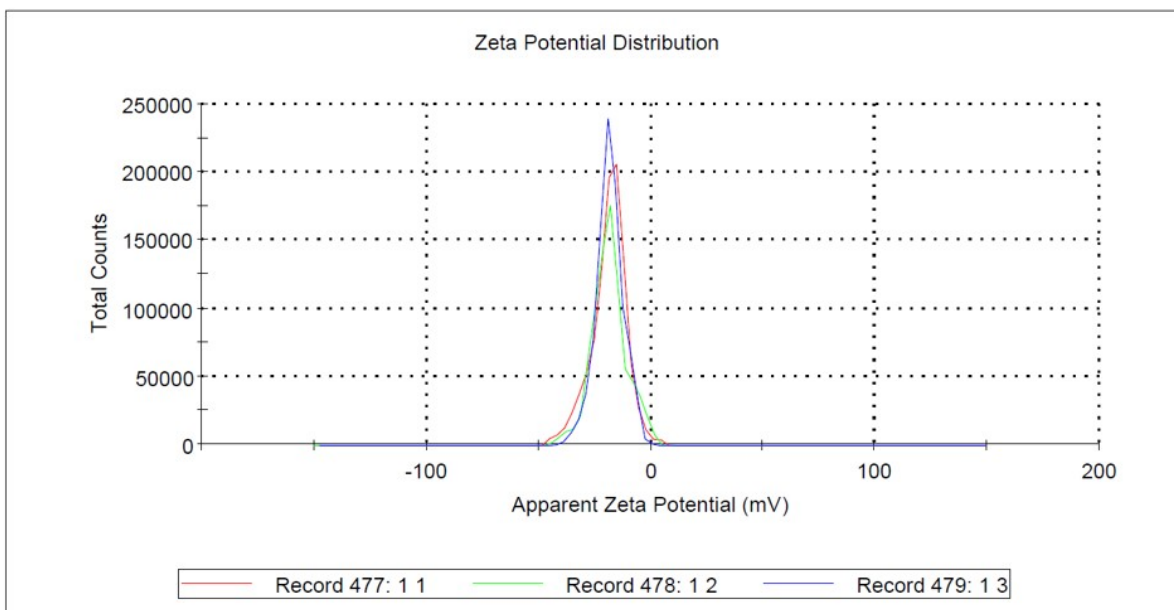

**Figure S3:** Zeta potential measurements of silver nanoparticles.

**(a) Observation in dark**

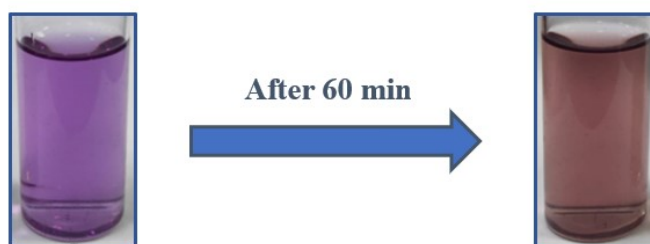

**(b) Observation under sunlight**

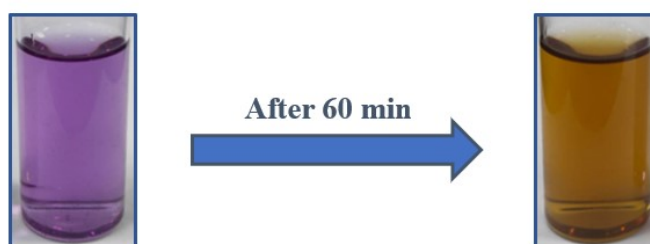

**Figure S4:** The color of dye CV solution with AgNPs after (60 min) and before. The change in color of CV solution after degradation in dark conditions (a) and under sunlight (b).

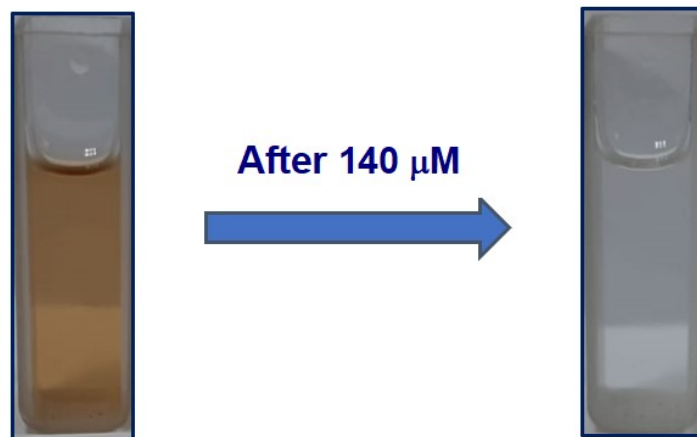

**Figure S5:** Change in color of AgNPs solution after addition of H<sub>2</sub>O<sub>2</sub> indicating the colorimetric detection of H<sub>2</sub>O<sub>2</sub> in water.
